# Supplementary material
Source: publisher figshare collection journal article supplement (https://karger.figshare.com/ndownloader/files/30950467)
Supplement: Supplementary file 1 [file 30950467]

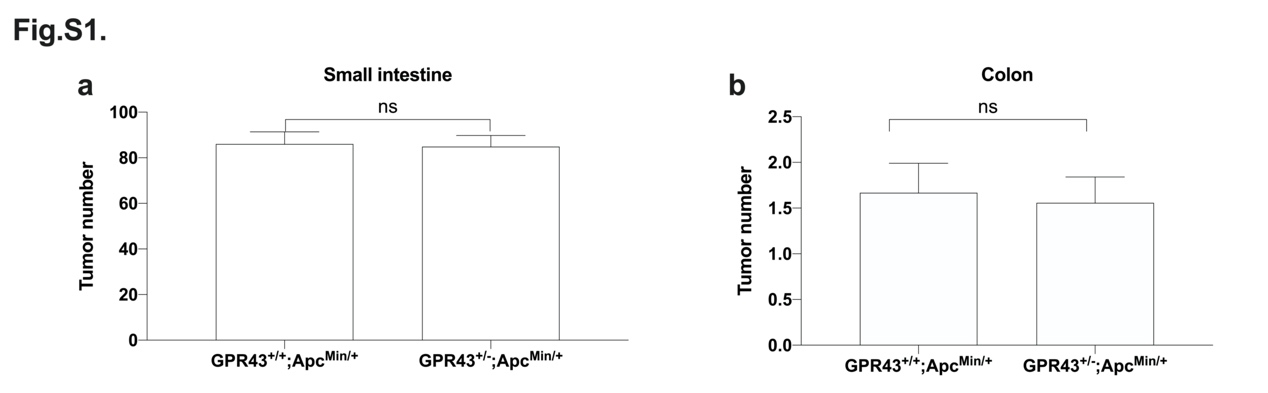
Fig. S1. One allele of GPR43 deficiency does not alter the tumor burden in ApcMin/+ mice. Total tumor burden in the small intestine (a) and colon (b) at 15 weeks of age. GPR43+/+; ApcMin/+, n=18, GPR43+/-; ApcMin/+, n=16. Statistical analysis was performed using Student’s t-test, ns: no significance.


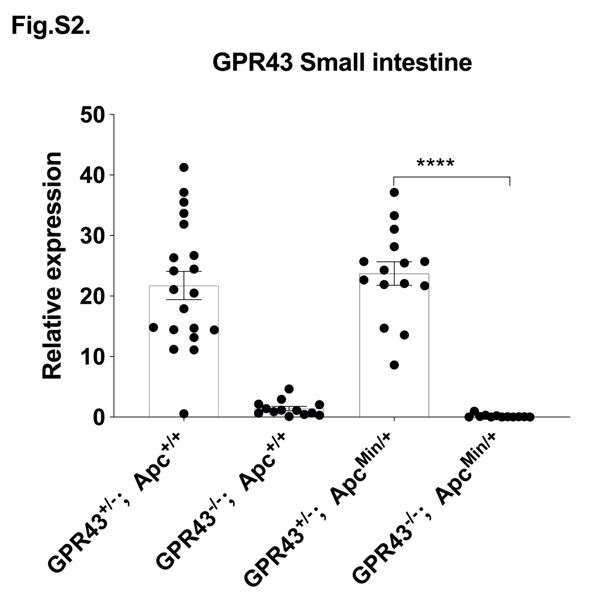


Fig. S2. GPR43 deficiency confirmed in GPR43-/- mice. Intestinal tissues were harvested from GPR43+/-; Apc+/+ (n=20), GPR43-/-; Apc+/+ (n=13), GPR43+/-; ApcMin/+ (n=15) and GPR43-/-; ApcMin/+ (n=12). GPR43 expression was analyzed by real-time PCR. Statistical analysis was performed using Student’s t-test, ****p < 0.0001.
